# Supplementary material for: Puerarin ameliorates allodynia and hyperalgesia in rats with peripheral nerve injury
Source: PubMed Central journal article supplement — Neural Regen Res. 2018 Jul;13(7):1263–8. doi: 10.4103/1673-5374.235074 (PMC6065236; doi:10.4103/1673-5374.235074), 2018-07
Supplement: NRR-13-1263_Suppl1.pdf [file NRR-13-1263_Suppl1.pdf]

### **Open peer review report 1**

**Reviewer:** Tufan Mert, Department of Biophysics, School of Medicine, University of Cukurova, 01330 Balcali, Adana, Turkey.

#### **Comments to the authors:**

This is an interesting study, and the study procedures and examinations are well performed.

Main conclusion of this manuscript is that puerarin can ameliorate allodynia and hyperalgesia induced by partial sciatic nerve ligation neuropathy model. Authors also suggest that TRPV1 and TRPA1 are contributed to the analgesic role of puerarin in neuropathic pain.

Comments,

1. Abstract is very informative. Some numerical data can be added.
2. A Working hypothesis for this study should be clearly expressed.
3. Material and Methods: Which animals did use in this study? Rat, mice?
4. What is the percent of DMSO?
5. Design of the study is very well but experimental animal groups should be clearly stated.
6. Radiant heat? What is your standard?
7. Results: statistically some important numerical data and P values should be added
8. Maximal efficiency should be explained.
9. Figures and tables should be revised for better presentation. Similar graphics should be combined.
